# Supplementary material for: Obesity-induced hepatic steatosis is mediated by endoplasmic reticulum stress in the subfornical organ of the brain
Source: JCI journal article supplement (doi:10.1172/jci.insight.90170), 2017-04-19
Supplement: sd1 [file 1]

*Supplementary Data*

**Obesity-induced Hepatic Steatosis is Mediated by Endoplasmic Reticulum Stress in  
the Subfornical Organ of the Brain**

Julie A. Horwath<sup>1,3</sup>, Chansol Hurr<sup>2</sup>, Scott D. Butler<sup>1</sup>, Mallikarjun Gururu<sup>3</sup>, Martin D.  
Cassell<sup>4</sup>, Allyn L. Mark<sup>3,5</sup>, Robin L. Davisson<sup>1,3</sup>, Colin N. Young<sup>2</sup>

<sup>1</sup>Biomedical Sciences, College of Veterinary Medicine, Cornell University, Ithaca, NY

<sup>2</sup>Pharmacology and Physiology, School of Medicine and Health Sciences, The George  
Washington University, Washington, D.C.

<sup>3</sup>Cell and Developmental Biology, Weill Cornell Medical College, New York, NY

<sup>4</sup>Anatomy and Cell Biology, University of Iowa, Iowa City, IA

<sup>5</sup>Internal Medicine, University of Iowa, Iowa City, IA

**Corresponding author:**

Colin N. Young, Ph.D.  
2300 Eye Street NW, 448 Ross Hall  
The George Washington University  
Washington, D.C., 20037  
E-mail: colinyoung@gwu.edu  
Phone: 202-994-9575  
Fax: 202-994-2870

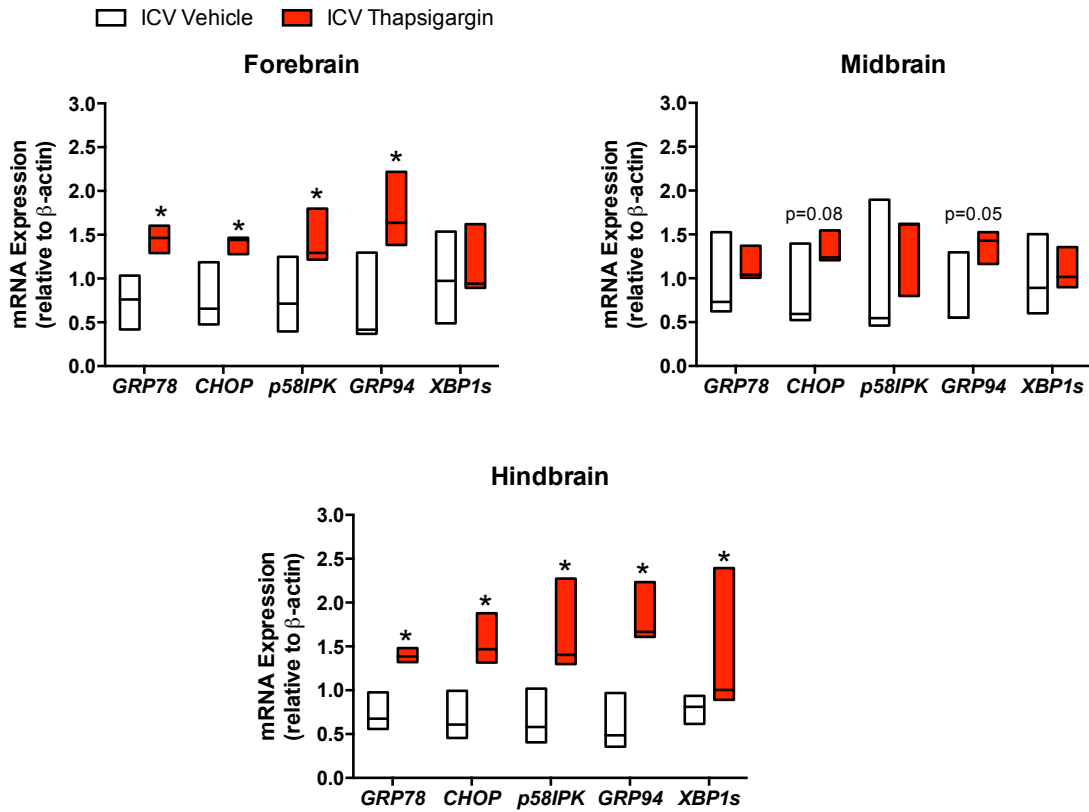

**Supplemental Figure 1. Daily ICV administration of thapsigargin causes UPR activation in the brain.** mRNA measurements of the ER stress markers *GRP78*, *CHOP*, *p58IPK*, *GRP94* and *XBP1s* in the forebrain, midbrain and hindbrain following 3 day ICV administration of the ER stress inducer thapsigargin or vehicle control. n=3/group. \*p<0.05 vs. ICV Vehicle. Box plots represent the median (line within box) and upper and lower quartile (bounds of box).

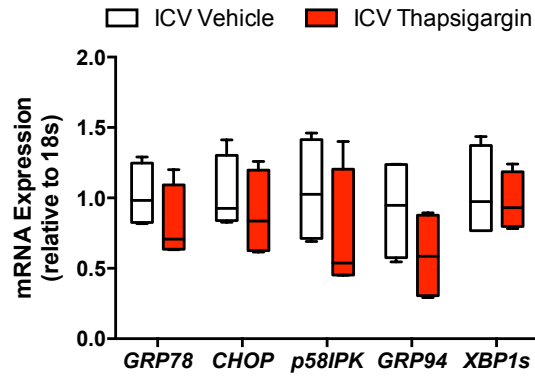

**Supplemental Figure 2. Short-term induction of brain ER stress does not alter hepatic UPR markers.** mRNA measurements of the ER stress markers *GRP78*, *CHOP*, *p58IPK*, *GRP94* and *XBP1s* in the liver following 3 day ICV administration of the ER stress inducer thapsigargin or vehicle control. n=4/group. Box-and-whisker plots represent the median (line within box), upper and lower quartile (bounds of box), and maximum and minimum values (bars).

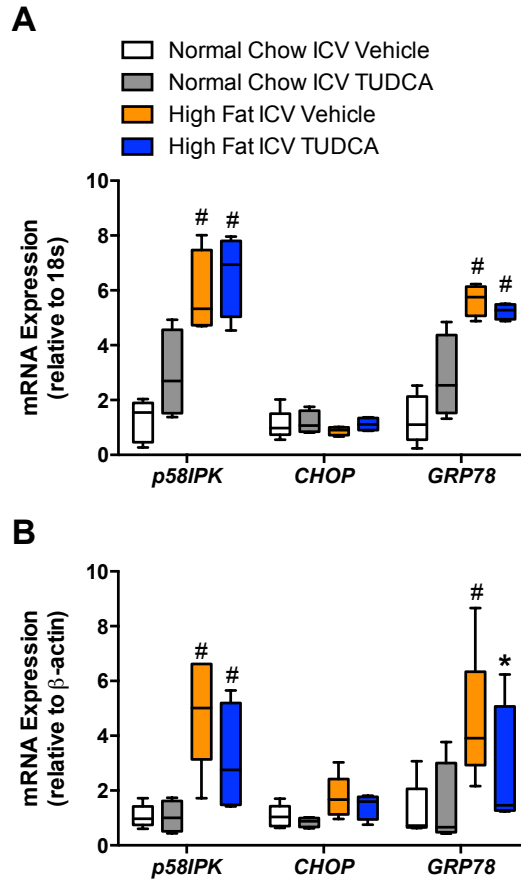

**Supplemental Figure 3. Short-term ICV TUDCA reduces obesity-induced ER stress in the SFO, but not the liver.** mRNA measurements of the ER stress markers *p58IPK*, *CHOP*, and *GRP78* in the liver (A) and SFO micropunches (B) following 3 day ICV administration of the ER stress chaperone TUDCA or vehicle control, in normal chow and HFD fed mice. n=6-8/group. #p<0.05 vs. Normal Chow groups; \*p<0.05 vs. High Fat ICV TUDCA. Box-and-whisker plots represent the median (line within box), upper and lower quartile (bounds of box), and maximum and minimum values (bars).

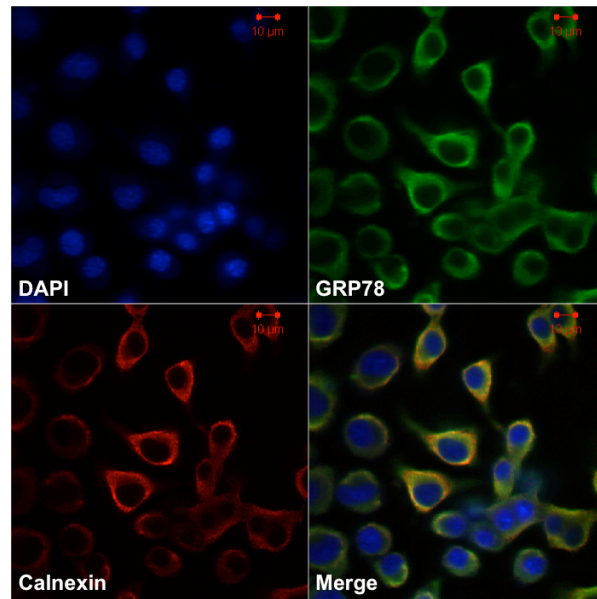

**Supplemental Figure 4. Adenoviral overexpression of GRP78 (AdGRP78) is targeted to the ER.** Immunohistochemistry of Neuro2A cells transfected with AdGRP78 demonstrating localization of the transgene to the ER, as indicated by co-labeling with the ER marker calnexin. Scale bar = 10 μm.

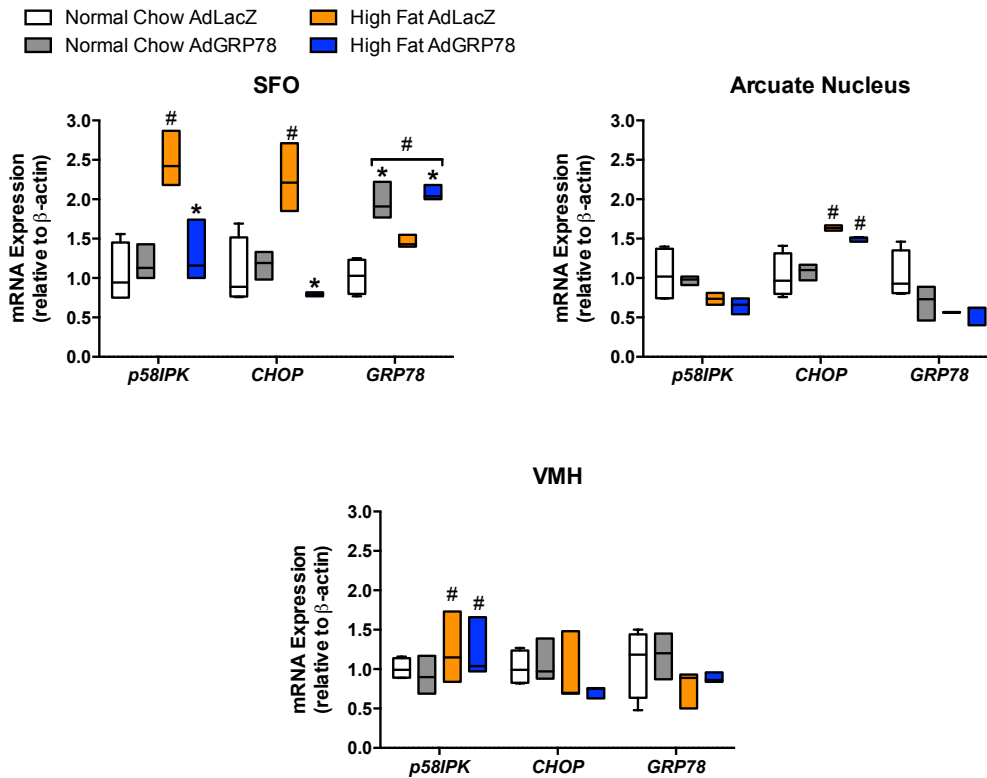

**Supplemental Figure 5. SFO-targeted adenoviral overexpression of GRP78 reduces obesity-induced ER stress in the SFO but not mediobasal hypothalamus.** mRNA measurements of the ER stress markers *p58IPK*, *CHOP* and *GRP78* following SFO-targeted AdGRP78, or control AdLacZ, in normal chow and HFD fed mice. VMH, ventromedial hypothalamus. n=3-4/group, 2 brains pooled per sample. #p<0.05 vs. Normal Chow groups; \*p<0.05 vs. High Fat AdLacZ. Box-and-whisker plots represent the median (line within box), upper and lower quartile (bounds of box), and maximum and minimum values (bars).

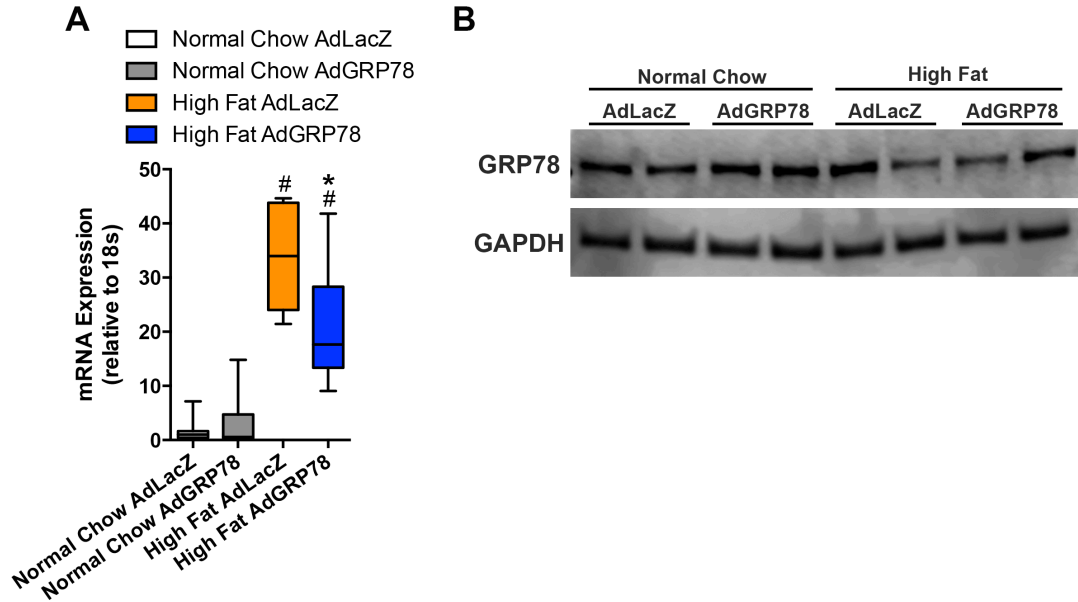

**Supplemental Figure 6. SFO-targeted adenoviral overexpression of GRP78 does not increase liver GRP78 expression.** (A) Liver mRNA measurements of *GRP78* following SFO-targeted AdGRP78, or control AdLacZ, in normal chow and HFD fed mice. n=6-8/group. #p<0.05 vs. Normal Chow groups; \*p<0.05 vs. High Fat AdLacZ. Box-and-whisker plots represent the median (line within box), upper and lower quartile (bounds of box), and maximum and minimum values (bars). (B) Western blot of liver GRP78 following SFO-targeted AdGRP78, or control AdLacZ, in normal chow and HFD fed mice.
